# Supplementary material for: Design principles for inflammasome inhibition by pyrin-only-proteins
Source: eLife journal article supplement (doi:10.7554/elife.81918), 2024-01-03
Supplement: fig2-data1 [file Fig2_SourceData.xlsx]

## Sheet: Fig2-B
ASCPYD	mCherry					DAPI
GFP vector 600	Cell count	Objective size	Detection threshold			Cell count	Objective size	Detection threshold	R/B*100		%	mean R/B*100 of control
	577	7.9	10038			1834	12.3	5431	31.4613		83.9245	37.4876
	691	8.2	10048			1908	12.4	5541	36.2159		96.6077
	772	8.7	10066			1863	12.5	5636	41.4385		110.539
	806	9	10088			2316	10.8	5999	34.8014		92.8343
	779	9.4	10064			1992	12.3	5377	39.1064		104.318
	771	9.4	10065			1840	12.3	5458	41.9022		111.776					ASCPYD
																600		1200
POP1 600	Cell count	Objective size	Detection threshold			Cell count	Objective size	Detection threshold	R/B*100							(-)	(+)	(-)	(+)
	652	8.9	10074			2275	10.5	5706	28.6593		76.4501					83.9245	76.4501	95.329	104.733
	670	8.9	10086			2314	9.7	6118	28.9542		77.2367					96.6077	77.2367	93.1042	77.8605
	847	8.5	10098			2248	10.2	6059	37.6779		100.508					110.539	100.508	105.557	77.3323
	668	8.9	10087			2197	10	6087	30.4051		81.107					92.8343	81.107	95.0432	74.1087
	646	9.3	10086			2183	10.4	5775	29.5923		78.9389					104.318	78.9389	110.967	77.8605
	580	8.5	10034			1367	12.8	5172	42.4287		113.18					111.776	113.18
															average	100	87.9035	100	82.3791
	mCherry					DAPI									stdev	10.8598	15.2925	7.82763	12.5939
GFP vector 1200	Cell count	Objective size	Detection threshold			Cell count	Objective size	Detection threshold	R/B*100
	180	9.6	10000			1674	11.9	5293	10.7527		95.329	11.2796
	180	10.4	10000			1714	12.5	5432	10.5018		93.1042
	178	10	10000			1495	12.9	5341	11.9064		105.557
	186	8.5	10010			1735	12	5263	10.7205		95.0432
	189	8.6	10002			1510	12.9	5170	12.5166		110.967
POP1 1200	Cell count	Objective size	Detection threshold			Cell count	Objective size	Detection threshold	R/B*100
	114	8.8	10000			965	13.4	5000	11.8135		104.733
	163	7.8	10000			1856	11.6	5382	8.78233		77.8605
	112	8.1	10000			1284	13.2	5070	8.72274		77.3323
	108	7.9	10000			1292	13.1	5053	8.35913		74.1087
	163	7.8	10000			1856	11.6	5382	8.78233		77.8605
	mCherry					DAPI
	Cell count	Objective size	Detection threshold			Cell count	Objective size	Detection threshold	R/B*100		%	mean R/B*100 of control
GFP vector 600	205	9.3	15000			849	16.2	5109	24.1461		79.4294	30.3994
	290	8.7	15000			1075	15.7	5248	26.9767		88.741
	302	8.4	15000			891	16.7	5240	33.8945		111.497
	353	8.7	15000			965	16.6	5259	36.5803		120.332				ASCPYD
															600		1200
															(-)	(+)	(-)	(+)
POP2 600	70	8.8	15000			1136	15	5290	6.16197		20.27				79.4294	20.27	122.24	3.89387
	54	8.3	15000			1123	15.1	5291	4.80855		15.8179				88.741	15.8179	88.0645	6.57551
	70	8.4	15000			1234	14.7	5360	5.67261		18.6603				111.497	18.6603	95.7026	4.6692
	69	7.7	15000			1283	14.4	5414	5.37802		17.6912				120.332	17.6912	93.9927	4.29147
GFP vector 1200	248	8.5	15009			1192	14.8	5350	20.8054		122.24	17.0201
	198	8.5	15006			1321	14.8	5458	14.9886		88.0645			average	100	18.1099	100	4.85751
	237	8.4	15010			1455	14.7	5698	16.2887		95.7026			stdev	19.1094	1.86169	15.1837	1.18828
	271	8.6	14658			1694	13.8	5920	15.9976		93.9927
GFP POP2 1200	9	7.9	15000			1358	14.4	5566	0.662739		3.89387
	17	7.4	15000			1519	13.5	5688	1.11916		6.57551
	12	8.7	15000			1510	13.4	5644	0.794702		4.6692
	11	8.2	15000			1506	13.3	5596	0.730412		4.29147
	mCherry					DAPI
GFP vector 600	Cell count	Objective size	Detection threshold			Cell count	Objective size	Detection threshold	R/B*100	%		mean R/B*100 of control
1	1154	9.8	5070			2019	11	5553	57.157	105.392		54.2327
2	935	8.9	5593			1739	10.9	5857	53.7665	99.1404
3	1058	9.3	5056			1886	11.1	5460	56.0976	103.439
4	1107	9.5	5084			2218	9.8	5867	49.9098	92.029
																ASCPYD
POP3 600																600		1200
1	756	9.3	4051			2442	9.1	4539	30.9582	57.084						(-)	(+)	(-)	(+)
2	698	9.1	4577			2145	8.6	5140	32.5408	60.0021						105.392	57.084	100.322	41.5358
3	652	8.8	4543			1676	10.4	4642	38.9021	71.7319						99.1404	60.0021	105.645	44.7887
4	523	9.6	4524			1373	11	4555	38.0918	70.2376						103.439	71.7319	94.0329	39.9368
																92.029	70.2376		46.2396
GFP vector 1200	Cell count	Objective size	Detection threshold			Cell count	Objective size	Detection threshold	R/B*100
1	631	9.1	5049			1618	9.3	5196	38.9988	100.322		38.8736
2	646	9	5041			1573	9.3	5191	41.068	105.645
3	681	9.5	5082			1863	8.5	5364	36.5539	94.0329
															average	100	64.7639	100	43.1252
															stdev	5.92099	7.30682	5.81279	2.89589
GFP POP3 1200
1	269	8.6	5028			1666	8.1	5288	16.1465	41.5358
2	308	8.2	5023			1769	9.2	5187	17.411	44.7887
3	281	8.8	5022			1810	9.7	5186	15.5249	39.9368
4	316	8.4	5021			1758	9.8	5190	17.975	46.2396

## Sheet: Fig2-D
ASCFL
	mCherry					DAPI
Vector 600	Cell count	Objective size	Detection threshold			Cell count	Objective size	Detection threshold	R/B*100			%		mean R/B*100 of control
	224	6.8	15000			1662	10.6	5189	13.4777			106.044	12.7096
	204	6.6	15000			1615	11	5124	12.6316			99.3862
	237	6.6	15005			1864	10.9	5275	12.7146			100.039
	222	6.7	15000			1653	11.3	5165	13.4301			105.669
	248	6.6	15019			1876	11	5347	13.2196			104.013
	238	6.4	15028			2207	10	5567	10.7839			84.8483
	mCherry					DAPI
POP1 600	Cell count	Objective size	Detection threshold			Cell count	Objective size	Detection threshold	R/B*100								ASCFL
	127	5.5	15000			1574	11	5148	8.06861			63.4845					600		1200
	108	5.8	15000			1038	12.7	5026	10.4046			81.8644					(-)	(+)	(-)	(+)
	111	5.5	15000			1049	12.8	5045	10.5815			83.2561					106.044	63.4845	117.012	76.9008
	130	5.9	15000			1260	12.3	5089	10.3175			81.1786					99.3862	81.8644	97.5826	63.6991
																	100.039	83.2561	88.8638	66.7869
	mCherry					DAPI											105.669	81.1786	87.0908	57.8232
Vector 1200	Cell count	Objective size	Detection threshold			Cell count	Objective size	Detection threshold	R/B*100								104.013		87.8832	88.9647
	84	5.6	15006			1726	10	5179	4.86674			117.012	4.15917				84.8483		121.567
	72	5.7	15007			1774	9.7	5213	4.05862			97.5826
	71	5.1	15025			1921	8.7	5625	3.69599			88.8638
	56	5.5	15000			1546	11.8	5169	3.62225			87.0908
	67	5.4	15015			1833	10.8	5284	3.65521			87.8832
	81	5.8	15000			1602	11.8	5167	5.05618			121.567				average	100	77.4459	100	70.8349
																stdev	7.93378	9.34765	15.4783	12.2688
	mCherry					DAPI
POP1 1200	Cell count	Objective size	Detection threshold			Cell count	Objective size	Detection threshold	R/B*100
	49	5.2	15000			1532	12.1	5152	3.19843			76.9008
	51	4.7	15000			1925	11.2	5297	2.64935			63.6991
	47	5	15000			1692	12	5253	2.77778			66.7869
	31	4.3	15000			1289	12.2	5076	2.40497			57.8232
	39	4.9	15000			1054	12.8	5036	3.70019			88.9647
	mCherry					DAPI
Vector 600	Cell count	Objective size	Detection threshold			Cell count	Objective size	Detection threshold	R/B*100	%		%	mean R/B*100 of control
	105	7.4	10000			1104	12.7	5111	9.51087	88.8063		99.3229	9.57571
	87	7.5	10000			873	13.3	5034	9.96564	93.0526		104.072
	83	7.8	10000			775	14	5014	10.7097	100		111.842
	122	7.9	10000			1210	11.9	5137	10.0826	94.1452		105.294
	96	8.1	10000			1209	11.6	5119	7.94045	74.1427		82.9228				ASCFL
	120	7.4	10000			1298	12	5148	9.24499	86.3237		96.5463
	mCherry					DAPI										600		1200
POP2 600	Cell count	Objective size	Detection threshold			Cell count	Objective size	Detection threshold	R/B*100	%						(-)	(+)	(-)	(+)
	121	8.3	10000			1578	8.7	5527	7.66793	80.6228		80.0769				99.3229	65.7832	102.584	16.8292
	109	8.5	10000			1492	8.8	5460	7.30563	76.8135		76.2933				104.072	43.3523	98.493	19.4379
	80	9	10000			1270	8.4	5424	6.29921	66.2317		65.7832				111.842	48.6039	110.5	25.2529
	45	6.9	10000			1084	11	5085	4.15129	66.1206		43.3523				105.294	65.5655	94.7569	23.3415
	72	6.8	10000			1547	8.8	1303	4.65417	74.1303		48.6039				82.9228	34.9201	93.6669	12.9772
	83	6.3	10000			1322	9	5528	6.27837	100		65.5655				96.5463	34.2516		26.0511
	53	6.9	10000			1585	10.3	5358	3.34385	53.2599		34.9201					39.2597
	47	7.4	10000			1433	10.5	5250	3.27983	52.2402		34.2516
	50	7	10000			1330	10	5223	3.7594	59.8786		39.2597
	mCherry					DAPI									average	100	51.645	100	20.6483
	Cell count	Objective size	Detection threshold			Cell count	Objective size	Detection threshold	R/B*100	%					stdev	9.88798	13.7059	6.83348	5.14864
Vector 1200	150	6.9	12000			2015	11.9	5501	7.44417	121.888			4.15306
	72	6.8	15000			1690	14.6	5990	4.26036	92.8361		102.584
	85	6.2	15000			2078	12.7	5990	4.09047	89.1342		98.493
	86	6.3	15000			1874	13.2	5703	4.58911	100		110.5
	73	6.7	15000			1855	13	5829	3.93531	85.7531		94.7569
	75	6.8	15000			1928	12.3	5666	3.89004	84.7667		93.6669
	mCherry					DAPI
POP2 1200	Cell count	Objective size	Detection threshold			Cell count	Objective size	Detection threshold	R/B*100	%
	13	7.2	15000			1860	13.2	5733	0.698925	15.2301		16.8292
	16	5.9	15000			1982	13	5786	0.807265	17.5909		19.4379
	20	5.9	15000			1907	12.9	5869	1.04877	22.8534		25.2529
	19	6.4	15000			1960	12.5	5725	0.969388	21.1236		23.3415
	11	5.1	15000			2041	12.2	5771	0.538951	11.7441		12.9772
	21	4.6	15000			1941	12.9	5805	1.08192	23.5757		26.0511
	mCherry					DAPI
Vector 600	Cell count	Objective size	Detection threshold			Cell count	Objective size	Detection threshold	R/B*100			%	mean R/B*100 of control
	178	8.4	10000			1715	13.2	5236	10.379			100.082	10.3705
	162	8.4	10000			1738	13	5201	9.32106			89.8803
	189	8.1	10000			1721	12.7	5174	10.982			105.896
	183	8.3	10000			1707	12.5	5054	10.7206			103.375
	187	8.6	10000			1800	12.4	5243	10.3889			100.177
	174	9	10000			1668	13	5109	10.4317			100.589
	mCherry					DAPI
POP3 600	Cell count	Objective size	Detection threshold			Cell count	Objective size	Detection threshold	R/B*100								ASCFL
	67	7.8	10000			1779	12.1	5078	3.76616			36.316
	99	8	10000			1980	11.8	5221	5			48.2136					600		1200
	62	7.8	10000			1813	10	5069	3.41975			32.9756					(-)	(+)	(-)	(+)
	73	7.2	10000			1939	10	5310	3.76483			36.3031					100.082	36.316	128.403	15.8327
	64	7.1	10000			1901	9.7	5247	3.36665			32.4636					89.8803	48.2136	103.93	14.6799
	72	7.1	10000			1846	9.4	5331	3.90033			37.6097					105.896	32.9756	105.345	21.8581
																	103.375	36.3031	74.0559	25.1244
	mCherry					DAPI											100.177	32.4636	88.2653	14.9227
Vector 1200	Cell count	Objective size	Detection threshold			Cell count	Objective size	Detection threshold	R/B*100								100.589	37.6097		20.2729
	150	6.9	12000			2015	11.9	5501	7.44417			128.403	5.79748
	119	7.9	12000			1975	10.8	5431	6.02532			103.93
	91	7.7	12000			1490	11.9	5072	6.10738			105.345
	96	7.2	12000			2236	10.2	5516	4.29338			74.0559
	107	6.8	12000			2091	10.9	5275	5.11717			88.2653				average	100	37.2544	100	18.7818
	mCherry					DAPI										stdev	5.45804	6.38647	20.3812	4.29723
POP3 1200	Cell count	Objective size	Detection threshold			Cell count	Objective size	Detection threshold	R/B*100
	18	6.1	12000			1961	11.6	5266	0.917899			15.8327
	16	5.6	12000			1880	11.8	5214	0.851064			14.6799
	23	6.9	12000			1815	12.3	5116	1.26722			21.8581
	26	6.9	12000			1785	12	5130	1.45658			25.1244
	17	7.1	12000			1965	11.6	5289	0.86514			14.9227
	24	7.1	12000			2042	11.6	5295	1.17532			20.2729
	1880

## Sheet: Fig2-E
ASCPYD
[POP2]	t1/2 (1)	t1/2 (2)	t1/2 (3)			Fraction 1	Fraction 2	Fraction 3			IC50
0	20	26	20			1	1	1			23.7
3.3	21.2	31	21			0.943396	0.83871	0.952381			27.3
6.7	23.9	35	24			0.83682	0.742857	0.833333			34
13.3	27.5	41				0.727273	0.634146
26.7	39.8	45				0.502513	0.577778			mean	28.3333
40	51	57	60			0.392157	0.45614	0.333333		stdev	5.22717
[POP3]	t1/2 (1)	t1/2 (2)	t1/2 (3)			Fraction 1	Fraction 2	Fraction 3
0	27	18.3	24			1	1	1			27
3	27.1					0.99631					53
7	34.5	21.5				0.782609	0.851163				25
15	41.4	26.8				0.652174	0.682836
20	48	30.5	34			0.5625	0.6	0.705882		mean	35
30	58	40.7	37			0.465517	0.449631	0.648649		stdev	15.6205
75			56					0.428571
100			68					0.352941

## Sheet: Fig2-S1
ASC PYD	mCherry					DAPI
vector	Cell count	Objective size	Detection threshold			Cell count	Objective size	Detection threshold	R/B*100		%	mean R/B*100 of control
	125	7.9	10000			1830	12.3	5000	6.8306		114.419	5.96983
	115	8.1	10000			1901	12.4	5000	6.04945		101.334
	94	8.7	10000			1869	12.5	5000	5.02943		84.2475
																ASC PYD
POP1 1200	Cell count	Objective size	Detection threshold			Cell count	Objective size	Detection threshold	R/B*100							Vector	POP1	POP2	POP3
	112	8.6	10000			2075	10.5	5000	5.39759		90.4145					114.419	90.4145	19.6649	61.6889
	88	8.9	10000			2014	9.7	5000	4.36941		73.1917					101.334	73.1917	20.1713	49.7462
	110	8.3	10000			2011	10.2	5000	5.46992		91.6261					84.2475	91.6261	14.2454	42.0975
															average	100	85.0774	18.0272	51.1776
															stdev	15.1298	10.3112	3.28489	9.87379
POP2 1200	Cell count	Objective size	Detection threshold			Cell count	Objective size	Detection threshold	R/B*100						p values		0.314733	0.00753626	0.00468213
	22	9.6	10000			1874	11.9	5000	1.17396		19.6649
	23	10.1	10000			1910	12.5	5000	1.20419		20.1713
	17	9.6	10000			1999	12.9	5000	0.850425		14.2454
																average	stdev
																100	15.1298
																85.0774	10.3112
POP3 1200	Cell count	Objective size	Detection threshold			Cell count	Objective size	Detection threshold	R/B*100							18.0272	3.28489
	65	8.8	10000			1765	13.4	5000	3.68272		61.6889					51.1776	9.87379
	55	8.8	10000			1852	11.6	5000	2.96976		49.7462
	43	8.5	10000			1711	13.2	5000	2.51315		42.0975
ASC FL	mCherry					DAPI
vector	Cell count	Objective size	Detection threshold			Cell count	Objective size	Detection threshold	R/B*100		%	mean R/B*100 of control
	93	6.9	10000			1854	12.3	5000	5.01618		84.0256	5.6358
	105	7.2	10000			1901	12.4	5000	5.52341		92.5221
	125	6.7	10000			1963	12.5	5000	6.3678		106.667
																ASC FL
POP1 1200	Cell count	Objective size	Detection threshold			Cell count	Objective size	Detection threshold	R/B*100							Vector	POP1	POP2	POP3
	99	6.9	10000			1965	10.5	5000	5.03817		84.3939					89.0057	89.3958	44.0224	37.86
	106	6.9	10000			1917	9.7	5000	5.52947		92.6237					98.0058	98.1134	26.8844	36.3766
	85	6.5	10000			1851	10.2	5000	4.59211		76.9221					112.989	81.4811	35.5239	40.0174
									a
															average	100	89.6635	35.4769	38.0847
	mCherry					DAPI									stdev	12.1151	8.31936	8.56908	1.83075
POP2 1200	Cell count	Objective size	Detection threshold			Cell count	Objective size	Detection threshold	R/B*100						p values		0.431817	0.0229198	0.010202
	49	6.6	10000			1975	11.9	5000	2.48101		41.5592
	29	7.4	10000			1914	12.5	5000	1.51515		25.3802
	39	7	10000			1948	12.9	5000	2.00205		33.5362
POP3 1200	Cell count	Objective size	Detection threshold			Cell count	Objective size	Detection threshold	R/B*100
	45	7.8	10000			2109	13.4	5000	2.13371		35.7416
	45	7.8	10000			2195	11.6	5000	2.05011		34.3413
	50	7.1	10000			2217	13.2	5000	2.2553		37.7783

## Sheet: Fig2-S2C
time	trial 1	trial 2	trial 3
0	0.11623	0.11663	0.11623
1	0.11508	0.11844	0.11508
2	0.1161	0.11811	0.1161
3	0.11564	0.11872	0.11564
4.0017	0.11613	0.11871	0.11613
5.0017	0.11541	0.11801	0.11541
6.0017	0.11518	0.11797	0.11518
7.0017	0.11651	0.11806	0.11651
8.0017	0.11701	0.11859	0.11701
9.0017	0.1168	0.11841	0.1168
10.002	0.11703	0.11811	0.11703
11.002	0.11719	0.11872	0.11719
12.002	0.11594	0.11843	0.11594
13.002	0.11547	0.11867	0.11547
14.002	0.11542	0.11778	0.11542
15.013	0.11755	0.11822	0.11755
16.002	0.11684	0.11994	0.11684
17.002	0.11561	0.11791	0.11561
18.002	0.11596	0.1199	0.11596
19.012	0.11549	0.11833	0.11549
20.003	0.11535	0.11948	0.11535
21.003	0.11681	0.11967	0.11681
22.003	0.11643	0.11879	0.11643
23.003	0.11729	0.11717	0.11729
24.003	0.11866	0.11884	0.11866
25.003	0.11588	0.11788	0.11588
26.003	0.11643	0.11783	0.11643
27.003	0.11668	0.11973	0.11668
28.003	0.11627	0.11772	0.11627
29.003	0.11535	0.11825	0.11535
30.003	0.11871	0.11894	0.11871
31.003	0.1164	0.11766	0.1164
32.003	0.11869	0.11948	0.11869
33.003	0.11835	0.11934	0.11835
34.003	0.11522	0.11717	0.11522
35.003	0.11839	0.11942	0.11839
36.003	0.11712	0.119	0.11712
37.003	0.11685	0.11935	0.11685
38.005	0.11851	0.11895	0.11851
39.022	0.11761	0.11794	0.11761
40.005	0.11663	0.11868	0.11663
41.005	0.11575	0.11753	0.11575
42.005	0.11476	0.11751	0.11476
43.005	0.11706	0.11719	0.11706
44.005	0.11647	0.11836	0.11647
45.023	0.11686	0.11735	0.11686
46.005	0.11746	0.11923	0.11746
47.005	0.11736	0.11724	0.11736
48.005	0.11764	0.11718	0.11764
49.005	0.1183	0.11955	0.1183
50.007	0.11677	0.11794	0.11677
51.023	0.11728	0.1174	0.11728
52.005	0.1168	0.11816	0.1168
53.005	0.1181	0.11778	0.1181
54.007	0.11762	0.11732	0.11762
55.023	0.11645	0.1165	0.11645
56.007	0.1166	0.11713	0.1166
57.007	0.11678	0.1182	0.11678
58.007	0.11819	0.11867	0.11819
59.007	0.11876	0.11732	0.11876
