# Supplementary material for: Design principles for inflammasome inhibition by pyrin-only-proteins
Source: eLife. 2024 Jan 22;13:e81918. doi: 10.7554/eLife.81918 (PMC10803020; doi:10.7554/eLife.81918)
Supplement: Figure 3—source data 1. [file elife-81918-fig3-data1.xlsx]

## Sheet: Fig3-B
AIM2PYD
	mCherry					DAPI
GFP vector 600	Cell count	Objective size	Detection threshold			Cell count	Objective size	Detection threshold	R/B*100	%		mean R/B*100 of control
	454	7.9	8000			1653	8.9	5340	27.4652	94.1759		29.1637
	437	8.3	8000			1464	9.2	5278	29.8497	102.352
	472	8.3	8000			1325	8.4	5578	35.6226	122.147
	442	8.5	8000			1767	9.7	5302	25.0141	85.7714
	469	8.3	8000			1683	9.8	5278	27.8669	95.5533
POP1 600	Cell count	Objective size	Detection threshold			Cell count	Objective size	Detection threshold	R/B*100
	238	7.6	8000			1308	8.7	5516	18.1957	62.3916						AIM2PYD
	285	7.4	8000			1394	8.3	5523	20.4448	70.1034						600		1200
	238	7.7	8000			1455	8.9	5356	16.3574	56.0881						(-)	(+)	(-)	(+)
	257	7.5	8000			1571	9.2	5271	16.359	56.0937						94.176	62.392	80.638	44.1076
	298	8.3	8000			1528	8.7	5346	19.5026	66.8729						102.35	70.103	117.3	49.4413
	241	8	8000			1415	8.7	5513	17.0318	58.4006						122.15	56.094	101.16	36.8243
																85.771	66.873	77.943	0
	mCherry					DAPI										95.553	58.401	109.19	46.2806
GFP vector 1200	Cell count	Objective size	Detection threshold			Cell count	Objective size	Detection threshold	R/B*100									113.78	29.322
	272	9	8009			1802	11.4	5200	15.0943	80.638		18.7187
	422	9.9	8127			1922	10	5740	21.9563	117.296
	338	9.7	8057			1785	10.6	5342	18.9356	101.159					average	100	62.7726	100.002	34.3293
	233	8.4	8000			1597	10.8	5118	14.5899	77.9429					stdev	13.7141	5.79671	16.9492	18.3119
	317	9.7	8020			1551	11.3	5162	20.4384	109.187
	348	9.1	8046			1634	10	5291	21.2974	113.777
POP1 1200	Cell count	Objective size	Detection threshold			Cell count	Objective size	Detection threshold	R/B*100
	143	8.6	8000			1732	10.8	5055	8.25635	44.1076
	190	8	8000			2053	9.6	5298	9.25475	49.4413
	134	7.6	8000			1944	9.5	5262	6.893	36.8243
	162	9.3	8000			1870	10.4	5187	8.6631	46.2806
	mCherry					DAPI
	Cell count	Objective size	Detection threshold			Cell count	Objective size	Detection threshold	R/B*100		%	mean R/B*100 of control
GFP vector 600	454	7.9	8000			1653	8.9	5340	27.4652		94.1759	31.6984
	437	8.3	8000			1464	9.2	5278	29.8497		102.352
	544	8.1	8000			1226	8.5	5408	44.3719		152.148
	472	8.3	8000			1325	8.4	5578	35.6226		122.147
	442	8.5	8000			1767	9.7	5302	25.0141		85.7714
	469	8.3	8000			1683	9.8	5278	27.8669		95.5533				AIM2PYD
															600		1200
POP2 600	60	8.7	8000			2000	9.4	5355	3		10.2868				(-)	(+)	(-)	(+)
	42	9	8000			2054	9	5382	2.04479		7.01142				86.6453	9.46419	80.638	2.42358
	78	8	8000			1787	9.8	5199	4.36486		14.9667				94.1678	6.45076	117.296	1.8308
	36	10.4	8000			1897	9.4	5221	1.89773		6.50717				139.982	13.7699	101.159	4.74381
	38	8.5	8000			1670	10.2	5044	2.27545		7.80233				112.38	5.98684	77.9429	1.53183
	59	8.7	8000			1894	10	5184	3.1151		10.6814				78.9129	7.17843	109.187	1.95401
															87.9126	9.8273	113.777	3.63111
														average	100	8.77958	100	2.68586
GFP vector 1200	272	9	8009			1802	11.4	5200	15.0943		80.638	18.7187		stdev	22.6049	2.90712	16.9476	1.24868
	422	9.9	8127			1922	10	5740	21.9563		117.296
	338	9.7	8057			1785	10.6	5342	18.9356		101.159
	233	8.4	8000			1597	10.8	5118	14.5899		77.9429
	317	9.7	8020			1551	11.3	5162	20.4384		109.187
	348	9.1	8046			1634	10	5291	21.2974		113.777
GFP POP2 1200	7	9.7	8000			1543	9	5115	0.453662		2.42358
	5	8.2	8000			1459	8.4	5150	0.3427		1.8308
	13	9.3	8000			1464	8.8	5118	0.887978		4.74381
	4	6.6	8000			1395	8.6	5165	0.286738		1.53183
	5	8.6	8000			1367	8	5380	0.365764		1.95401
	8	7.6	8000			1177	7.9	5429	0.679694		3.63111
	mCherry					DAPI
GFP vector 600	Cell count	Objective size	Detection threshold			Cell count	Objective size	Detection threshold	R/B*100	%		mean R/B*100 of control
	454	7.9	8000			1653	8.9	5340	27.4652	#DIV/0!		31.6984
	437	8.3	8000			1464	9.2	5278	29.8497	#DIV/0!
	544	8.1	8000			1226	8.5	5408	44.3719	d
	472	8.3	8000			1325	8.4	5578	35.6226	#DIV/0!
	442	8.5	8000			1767	9.7	5302	25.0141	#DIV/0!
	469	8.3	8000			1683	9.8	5278	27.8669	#DIV/0!
GFP POP3 600	159	8.7	8000			1616	11.2	5051	9.83911	#DIV/0!					AIM2PYD
	168	8.1	8000			1540	11.1	5020	10.9091	#DIV/0!					600		1200
	146	8.6	8000			1518	11.3	5012	9.61792	#DIV/0!					(-)	(+)	(-)	(+)
	128	8.8	8000			1752	10.6	5113	7.30594	#DIV/0!					86.6453	31.0397	80.638	14.3919
	173	8	8000			1960	10.1	5249	8.82653	#DIV/0!					94.1678	34.4152	117.296	10.3189
	210	8.5	8000			1856	10.6	5258	11.3147	#DIV/0!					139.982	30.3419	101.159	8.41056
	173	8.9	8000			1966	10.7	5202	8.79959	#DIV/0!					112.38	23.0483	77.9429	11.7978
															78.9129	27.8453	109.187	17.0285
															87.9126	35.6947	113.777	13.6891
GFP vector 1200	Cell count	Objective size	Detection threshold			Cell count	Objective size	Detection threshold	R/B*100							27.7603
	272	9	8009			1802	11.4	5200	15.0943	#DIV/0!		18.7187		average	100	30.3975	100	12.6061
	422	9.9	8127			1922	10	5740	21.9563	#DIV/0!				stdev	22.6049	4.58569	16.9476	3.07917
	338	9.7	8057			1785	10.6	5342	18.9356	#DIV/0!
	233	8.4	8000			1597	10.8	5118	14.5899	#DIV/0!
	317	9.7	8020			1551	11.3	5162	20.4384	#DIV/0!
	348	9.1	8046			1634	10	5291	21.2974	#DIV/0!
GFP POP3 1200	50	8	8000			1856	10	5307	2.69397	#DIV/0!
	35	8.8	8000			1812	9.9	5320	1.93157	#DIV/0!
	27	9.1	8000			1715	9.9	5222	1.57434	#DIV/0!
	39	9.3	8000			1766	9.2	5515	2.20838	#DIV/0!
	51	7.7	8000			1600	9.1	5442	3.1875	#DIV/0!
	39	7.9	8000			1522	9.1	5631	2.56242	#DIV/0!

## Sheet: Fig3-D
IFI16PYD
	mCherry					DAPI
GFP vector 600	Cell count	Objective size	Detection threshold			Cell count	Objective size	Detection threshold	R/B*100	%		mean R/B*100 of control
	480	8.5	5000			1721	10.8	5196	27.8908	97.4087		28.6327
	523	8.4	5000			1957	10.1	5386	26.7246	93.3358
	614	8.3	5010			2075	9.2	5761	29.5904	103.345
	504	8.3	5007			2063	9.6	5675	24.4304	85.3235
	547	8.2	5002			2021	10.5	5507	27.0658	94.5275
	598	8.5	5000			1694	11.2	5327	35.3011	123.289
	482	8.6	5000			1638	11.4	5128	29.4261	102.771
	498	9	5000			1583	10.9	5021	31.4593
POP1 600	Cell count	Objective size	Detection threshold			Cell count	Objective size	Detection threshold	R/B*100						IFI16PYD
	365	8	5003			2123	9.7	5687	17.1927	60.0454
	407	8.3	5005			2262	10	5778	17.9929	62.8404					600		1200
	351	8.4	5000			1956	11.1	5478	17.9448	62.6723					(-)	(+)	(-)	(+)
	371	8.1	5000			1551	12.2	5179	23.9201	83.5409					97.4087	60.0454	112.327	19.9718
	294	8.7	5000			1372	12.3	5000	21.4286	74.8394					93.3358	62.8404	81.5186	40.7576
	379	8.3	5000			1479	12.8	5128	25.6254	89.4969					103.345	62.6723	80.0494	44.6332
	329	8.2	5000			1581	12.4	5194	20.8096	72.6777					85.3235	83.5409	86.7191	34.902
	399	8.1	5000			1631	12.5	5036	24.4635						94.5275	74.8394	116.817	33.9249
															123.289	89.4969	115.149	27.4222
	mCherry					DAPI									102.771	72.6777	107.42	33.2564
GFP vector 1200	Cell count	Objective size	Detection threshold			Cell count	Objective size	Detection threshold	R/B*100								127.398	40.7355
	196	7	8006			1251	13.4	5018	15.6675	112.327		13.9481
	195	7.3	8020			1715	11.8	5158	11.3703	81.5186
	183	7.3	8023			1639	11.9	5104	11.1653	80.0494				average	100	72.3019	100	33.5526
	258	7.4	8063			2133	10.6	5506	12.0956	86.7191				stdev	11.9563	11.2623	16.509	8.1523
	233	7.3	8017			1430	13.2	5093	16.2937	116.817
	221	7.3	8014			1376	13.4	5038	16.061	115.149
	264	7.6	8000			1762	12.2	5233	14.983	107.42
	290	7.4	8000			1632	12.6	5196	17.7696	127.398
POP1 1200	Cell count	Objective size	Detection threshold			Cell count	Objective size	Detection threshold	R/B*100
	49	7.5	8000			1759	11.1	5214	2.78567	19.9718
	105	7.1	8000			1847	10.9	5260	5.68489	40.7576
	111	7.1	8000			1783	10.8	5181	6.22546	44.6332
	96	7.3	8000			1972	10.2	5326	4.86815	34.902
	90	7	8000			1902	11	5372	4.73186	33.9249
	76	7.1	8000			1987	10	5357	3.82486	27.4222
	86	7.3	8000			1854	10.7	5392	4.63862	33.2564
	115	7.2	8000			2024	10.3	5421	5.68182	40.7355
	mCherry					DAPI
IFI16 PYD-GFP vector 600	Cell count	Objective size	Detection threshold			Cell count	Objective size	Detection threshold	R/B*100	%		mean R/B*100 of control
	480	8.5	5000			1721	10.8	5196	27.8908	97.4087		28.986
	523	8.4	5000			1957	10.1	5386	26.7246	93.3358
	614	8.3	5010			2075	9.2	5761	29.5904	103.345
	504	8.3	5007			2063	9.6	5675	24.4304	85.3235
	547	8.2	5002			2021	10.5	5507	27.0658	94.5275
	598	8.5	5000			1694	11.2	5327	35.3011	123.289
	482	8.6	5000			1638	11.4	5128	29.4261	102.771
	498	9	5000			1583	10.9	5021	31.4593	109.872
IFI16 PYD-POP2 600	Cell count	Objective size	Detection threshold			Cell count	Objective size	Detection threshold	R/B*100						IFI16PYD
	101	7.4	5000			1501	13.5	5253	6.72885	23.5005
	113	7.5	5000			1679	13.3	5419	6.7302	23.5053					600		1200
	112	7.6	5000			1807	12.8	5582	6.19812	21.647					(-)	(+)	(-)	(+)
	77	6.7	5000			2099	9.5	5849	3.66841	12.812					96.2213	23.2141	108.608	4.32866
	82	7.8	5000			2172	9.7	5807	3.77532	13.1853					92.1981	23.2187	78.8192	2.39967
	100	8.1	5000			2146	10.5	5661	4.65983	16.2745					102.085	21.3831	77.3987	6.43559
	86	7.5	5000			1833	11.8	5425	4.69176	16.386					84.2834	12.6558	83.8475	13.4097
	95	7.4	5000			1858	11.4	5343	5.11302	17.8573					93.3753	13.0246	112.949	20.1513
															121.786	16.0761	111.336	17.9587
	mCherry					DAPI									101.518	16.1863	103.863
IFI16 PYD-GFP vector 1200	Cell count	Objective size	Detection threshold			Cell count	Objective size	Detection threshold	R/B*100						108.532	17.6396	123.18
	196	7	8006			1251	13.4	5018	15.6675	112.327		14.4258
	195	7.3	8020			1715	11.8	5158	11.3703	81.5186				average	100	17.9248	100	10.7806
	183	7.3	8023			1639	11.9	5104	11.1653	80.0494				stdev	11.4651	4.24698	17.4963	7.44303
	258	7.4	8063			2133	10.6	5506	12.0956	86.7191
	233	7.3	8017			1430	13.2	5093	16.2937	116.817
	221	7.3	8014			1376	13.4	5038	16.061	115.149
	264	7.6	8000			1762	12.2	5233	14.983	107.42
	290	7.4	8000			1632	12.6	5196	17.7696	127.398
IFI16 PYD-POP2 1200	Cell count	Objective size	Detection threshold			Cell count	Objective size	Detection threshold	R/B*100
	14	7.9	8000			2242	11.4	6074	0.624442	4.47691
	8	7.5	8000			2311	11.6	6263	0.34617	2.48185
	21	7.8	8000			2262	11.1	6320	0.928382	6.65599
	36	9.1	8000			1861	13.1	5794	1.93444	13.8689
	45	9.4	8000			1548	13.9	5418	2.90698	20.8414
	45	9.2	8000			1737	13	5490	2.59067	18.5737
	mCherry					DAPI
IFI16 PYD-GFP vector 600	Cell count	Objective size	Detection threshold			Cell count	Objective size	Detection threshold	R/B*100	%		mean R/B*100 of control
	480	8.5	5000			1721	10.8	5196	27.8908	97.4087		28.986
	523	8.4	5000			1957	10.1	5386	26.7246	93.3358
	614	8.3	5010			2075	9.2	5761	29.5904	103.345
	504	8.3	5007			2063	9.6	5675	24.4304	85.3235
	547	8.2	5002			2021	10.5	5507	27.0658	94.5275
	598	8.5	5000			1694	11.2	5327	35.3011	123.289
	482	8.6	5000			1638	11.4	5128	29.4261	102.771
	498	9	5000			1583	10.9	5021	31.4593	109.872						IFI16PYD
IFI16 PYD-POP3 600	Cell count	Objective size	Detection threshold			Cell count	Objective size	Detection threshold	R/B*100							600		1200
	144	7.3	5000			1816	9.5	5178	7.92952	27.6939						(-)	(+)	(-)	(+)
	168	7.4	5000			1717	9.9	5095	9.78451	34.1725						96.2213	27.3563	108.608	30.8632
	169	7.5	5000			1826	10.3	5254	9.2552	32.3239						92.1981	33.7559	78.8192	23.0842
	204	7.3	5000			1832	10.1	5242	11.1354	38.8904						102.085	31.9299	77.3987	29.0061
	148	7.6	5000			1664	10.4	5067	8.89423	31.0632						84.2834	38.4163	83.8475	23.0274
	138	7.2	5000			1353	12.2	5000	10.1996	35.622						93.3753	30.6845	112.949	19.1599
	146	7.5	5000			1388	11.9	5000	10.5187	36.7367						121.786	35.1878	111.336	18.5514
	186	7.4	5000			1721	11.2	5157	10.8077	37.7459						101.518	36.2889	103.863
																108.532	37.2858	123.18
	mCherry					DAPI
IFI16 PYD-GFP vector 1200	Cell count	Objective size	Detection threshold			Cell count	Objective size	Detection threshold	R/B*100						average	100	33.8632	100	23.9487
	196	7	8006			1251	13.4	5018	15.6675	112.327		14.4258			stdev	11.4651	3.70861	17.4963	5.0408
	195	7.3	8020			1715	11.8	5158	11.3703	81.5186
	183	7.3	8023			1639	11.9	5104	11.1653	80.0494
	258	7.4	8063			2133	10.6	5506	12.0956	86.7191
	233	7.3	8017			1430	13.2	5093	16.2937	116.817
	221	7.3	8014			1376	13.4	5038	16.061	115.149
	264	7.6	8000			1762	12.2	5233	14.983	107.42
	290	7.4	8000			1632	12.6	5196	17.7696	127.398
IFI16 PYD-POP3 1200	Cell count	Objective size	Detection threshold			Cell count	Objective size	Detection threshold	R/B*100
	76	9	8000			1707	13.4	5663	4.45226	31.9202
	68	8.5	8000			2042	10	5633	3.33007	23.8748
	69	9.2	8009			1649	9	5577	4.18435	29.9995
	58	7.6	8000			1746	10	5311	3.32188	23.8161
	50	8	8000			1809	9.6	5382	2.76396	19.8161
	60	8.1	8000			2242	11.4	6074	2.67618	19.1868

## Sheet: Fig3-E
AIM2PYD
[POP1]	t1/2 (1)	t1/2 (2)	t1/2 (3)		Fraction 1	Fraction 2	Fraction 3				IC50
0	38	38	19		1	1	1				131
25	45	47			0.844444	0.808511					142
50			23				0.826087				149
75	56	56	27		0.678571	0.678571	0.703704
100			31				0.612903			mean	140.667
150	75	80	40		0.506667	0.475	0.475			stdev	9.07377
[POP2]	t1/2 (1)	t1/2 (2)	t1/2 (3)		Fraction 1	Fraction 2	Fraction 3
0	27	18	18		1	1	1				28
6	28.5		19		0.947368		0.947368				54
12	31.5	24	21		0.857143	0.75	0.857143				66
25	37	32	23		0.72973	0.5625	0.782609
50	44.9	58	38		0.601336	0.310345	0.473684			mean	49.3333
75	56	81			0.482143	0.222222				stdev	19.4251
[POP3]	t1/2 (1)	t1/2 (2)	t1/2 (3)		Fraction 1	Fraction 2	Fraction 3
0	22	24	45		1	1	1				17.5
7.5	32				0.6875						38.7
15	39				0.564103						24.1
25		48	74			0.5	0.608108
30	65				0.338462					mean	26.7667
40	75				0.293333					stdev	10.8487
50	96.5	70	215		0.227979	0.342857	0.209302
75		82	343			0.292683	0.131195

## Sheet: Fig3-S1D
AIM2FL
	mCherry					DAPI
Vector 600	Cell count	Objective size	Detection threshold			Cell count	Objective size	Detection threshold	R/B*100		%		mean R/B*100 of control
	1273	2.7	10000			1510	13.5	5159	84.3046		113.383	74.3536
	1384	2.6	10000			1807	12.8	5249	76.591		103.009
	1454	2.6	10000			1924	12.6	5349	75.5717		101.638
	1327	2.7	10000			1864	12.5	5316	71.191		95.7466
	1409	2.5	10000			2065	12.2	5327	68.2324		91.7675
	1478	2.5	10005			2269	11.4	5612	65.1388		87.6069
	1645	2.5	10015			2586	10.3	5909	63.6118		85.5531
	1177	3	10000			1319	14.1	5068	89.2343		120.013
	860	3.1	10000			1142	13.6	5000	75.3065		101.282
	mCherry					DAPI
POP1 600	Cell count	Objective size	Detection threshold			Cell count	Objective size	Detection threshold	R/B*100
	674	3.1	10000			1305	13.5	5046	51.6475		69.462						AIM2FL
	860	2.7	10000			1503	13	5155	57.2189		76.9551
	953	2.7	10000			1567	13.4	5247	60.8168		81.7941						600		1200
	590	3.2	10000			1066	14.6	5019	55.3471		74.4377						(-)	(+)	(-)	(+)
	505	3	10000			842	13.7	5000	59.9762		80.6636						113.383	69.462	110.254	45.4208
	695	2.5	10000			1030	13.4	5000	67.4757		90.7498						103.009	76.9551	81.1026	58.9501
	634	3.1	10000			996	13.8	5000	63.6546		85.6107						101.638	81.7941	82.9975	56.9184
																	95.7466	74.4377	144.662	73.127
																	91.7675	80.6636	107.995	73.2153
																	87.6069	90.7498	72.9891	56.0133
																	85.5531	85.6107
																	120.013
	mCherry					DAPI											101.282
Vector 1200	Cell count	Objective size	Detection threshold			Cell count	Objective size	Detection threshold	R/B*100
	894	3.5	10000			782	14.9	5000	114.322		110.254	103.69				average	100	79.9533	100	60.6075
	883	3.6	10000			1050	13.7	5000	84.0952		81.1026					stdev	11.4084	7.09391	26.6066	10.8055
	889	3.6	10000			1033	13.8	5000	86.06		82.9975
	1038	3.5	10000			692	15.5	5000	150		144.662
	888	2.9	10000			793	16.1	5002	111.98		107.995
	305	3.1	10000			403	14.7	5000	75.6824		72.9891
	mCherry					DAPI
Vector 600	Cell count	Objective size	Detection threshold			Cell count	Objective size	Detection threshold	R/B*100	%		%	mean R/B*100 of control
	801	2.4	15000			2112	12.3	5944	37.9261	100		106.095	35.7475
	776	2.6	15000			2092	12.6	6073	37.0937	97.8051		103.766
	665	2.8	15000			1963	13	2547	33.8767	89.3229		94.7667
	742	2.8	15000			2019	12.5	5847	36.7509	96.9012		102.807
	680	2.7	15000			2055	12.6	5869	33.09	87.2486		92.566
	mCherry					DAPI
	Cell count	Objective size	Detection threshold			Cell count	Objective size	Detection threshold	R/B*100	%						AIM2FL
POP2 600	Cell count	Objective size	Detection threshold			Cell count	Objective size	Detection threshold	R/B*100
	603	2.6	15000			2243	12.3	6235	26.8836	70.8842		75.2043				600		1200
	505	2.6	15000			2237	11.9	6162	22.5749	59.5233		63.1509				(-)	(+)	(-)	(+)
	428	2.6	15000			2310	11.9	6129	18.5281	48.8532		51.8306				106.095	75.2043	78.7898	9.85828
	502	2.5	15000			2362	11.7	6221	21.2532	56.0383		59.4536				103.766	63.1509	104.661	9.35385
	463	2.4	15000			2375	11.8	6090	19.4947	51.4019		54.5346				94.7667	51.8306	111.752	21.3853
	497	2.6	15000			2116	12.8	6201	23.4877	61.9301		65.7045				102.807	59.4536	104.797	22.4103
																92.566	54.5346
	mCherry					DAPI											65.7045
Vector 1200	Cell count	Objective size	Detection threshold			Cell count	Objective size	Detection threshold	R/B*100
	1028	2.9	15000			2116	12.2	6407	48.5822	70.5044		78.7898	61.6605
	1241	2.8	15031			1923	13	6125	64.5346	93.6551		104.661
	1292	2.8	15048			1875	13.3	5956	68.9067	100		111.752
	1220	2.7	15030			1888	13.4	6090	64.6186	93.7771		104.797			average	100	61.6464	100	15.752
	mCherry					DAPI									stdev	5.95515	8.41765	14.5226	7.11197
POP2 1200	Cell count	Objective size	Detection threshold			Cell count	Objective size	Detection threshold	R/B*100	%
	153	2.5	15000			2517	9.8	5984	6.07867	8.82159		9.85828
	139	2.8	15000			2410	10.8	6112	5.76763	8.37021		9.35385
	293	2.4	15000			2222	11.1	5993	13.1863	19.1365		21.3853
	321	2.4	15000			2323	11.1	6065	13.8183	20.0537		22.4103
	mCherry					DAPI
Vector 600	Cell count	Objective size	Detection threshold			Cell count	Objective size	Detection threshold	R/B*100			%	mean R/B*100 of control
	178	8.4	10000			1715	13.2	5236	10.379			100.082	10.3705
	162	8.4	10000			1738	13	5201	9.32106			89.8803
	189	8.1	10000			1721	12.7	5174	10.982			105.896
	183	8.3	10000			1707	12.5	5054	10.7206			103.375
	187	8.6	10000			1800	12.4	5243	10.3889			100.177
	174	9	10000			1668	13	5109	10.4317			100.589
	mCherry					DAPI
POP3 600	Cell count	Objective size	Detection threshold			Cell count	Objective size	Detection threshold	R/B*100								ASCFL
	67	7.8	10000			1779	12.1	5078	3.76616			36.316
	99	8	10000			1980	11.8	5221	5			48.2136					600		1200
	62	7.8	10000			1813	10	5069	3.41975			32.9756					(-)	(+)	(-)	(+)
	73	7.2	10000			1939	10	5310	3.76483			36.3031					100.082	36.316	128.403	15.8327
	64	7.1	10000			1901	9.7	5247	3.36665			32.4636					89.8803	48.2136	103.93	14.6799
	72	7.1	10000			1846	9.4	5331	3.90033			37.6097					105.896	32.9756	105.345	21.8581
																	103.375	36.3031	74.0559	25.1244
	mCherry					DAPI											100.177	32.4636	88.2653	14.9227
Vector 1200	Cell count	Objective size	Detection threshold			Cell count	Objective size	Detection threshold	R/B*100								100.589	37.6097		20.2729
	150	6.9	12000			2015	11.9	5501	7.44417			128.403	5.79748
	119	7.9	12000			1975	10.8	5431	6.02532			103.93
	91	7.7	12000			1490	11.9	5072	6.10738			105.345
	96	7.2	12000			2236	10.2	5516	4.29338			74.0559
	107	6.8	12000			2091	10.9	5275	5.11717			88.2653				average	100	37.2544	100	18.7818
	mCherry					DAPI										stdev	5.45804	6.38647	20.3812	4.29723
POP3 1200	Cell count	Objective size	Detection threshold			Cell count	Objective size	Detection threshold	R/B*100
	18	6.1	12000			1961	11.6	5266	0.917899			15.8327
	16	5.6	12000			1880	11.8	5214	0.851064			14.6799
	23	6.9	12000			1815	12.3	5116	1.26722			21.8581
	26	6.9	12000			1785	12	5130	1.45658			25.1244
	17	7.1	12000			1965	11.6	5289	0.86514			14.9227
	24	7.1	12000			2042	11.6	5295	1.17532			20.2729

## Sheet: Fig3-S2
AIM2									IFI16
[POP1] µM	∆FA run 1	∆FA run 2	Fraction 1	Fraction 2	average	stdev			[POP1] µM	∆FA run 1	∆FA run 2	Fraction 1	Fraction 2	average	stdev
0	85	90	1	1	1	0			0	98	95	1	1	1	0
25	78	115	0.917647	1.27778	1.09771	0.127325			25	98	113	1	1.18947	1.09474	0.133978
50	70	100	0.823529	1.11111	0.96732	0.101675			50	101	81	1.03061	0.852632	0.941622	0.125851
100	80	110	0.941176	1.22222	1.0817	0.0993647			100	101	83	1.03061	0.873684	0.952148	0.110965
[POP2] µM	∆FA run 1	∆FA run 2	Fraction 1	Fraction 2	average	stdev			[POP2] µM	∆FA run 1	∆FA run 2	Fraction 1	Fraction 2	average	stdev
0	42	34	1	1	1	0			0	33	41	1	1	1	0
12.5	17	21	0.404762	0.617647	0.511204	0.0752663			10	39	44	1.18182	1.07317	1.12749	0.0543237
20	4	4	0.0952381	0.117647	0.106443	0.00792277			20	51	36	1.54545	0.878049	1.21175	0.333703
50	5	3	0.119048	0.06	0.0895238	0.0208765			30	34	34	1.0303	0.829268	0.929786	0.100517
[POP3] µM	∆FA run 1	∆FA run 2	Fraction 1	Fraction 2	average	stdev			[POP3] µM	∆FA run 1	∆FA run 2	fraction1	Fraction	average	stdev
0	85	80	1	1	1	0			0	55	59	1	1	1	0
10	75	75	0.882353	0.9375	0.909926	0.0389949			10	22	68	0.4	1.15254	0.776271	0.376271
20	50	83	0.588235	1.0375	0.812868	0.317678			20	18	56	0.327273	0.949153	0.638213	0.31094
30	40	51	0.470588	0.6375	0.554044	0.118024			30	20	33	0.363636	0.559322	0.461479	0.0978428
40	12	7	0.141176	0.0875	0.114338	0.037955

## Sheet: Fig3-S3
AIM2 PYD	mCherry					DAPI
vector	Cell count	Objective size	Detection threshold			Cell count	Objective size	Detection threshold	R/B*100		%	mean R/B*100 of control
	134	7.6	10038			1897	12.3	5000	7.06378		108.251	6.52536
	129	8.3	10048			1859	12.4	5000	6.93921		106.342
	106	8.1	10066			1902	12.5	5000	5.57308		85.4065
																AIM2 PYD
POP1 1200	Cell count	Objective size	Detection threshold			Cell count	Objective size	Detection threshold	R/B*100							Vector	POP1	POP2	POP3
	91	8.4	10074			1900	10.5	5000	4.78947		73.3978					108.251	73.3978	19.3008	28.3793
	85	8.9	10086			1950	9.7	5000	4.35897		66.8005					106.342	66.8005	21.0785	27.2441
	71	8.6	10098			1989	10.2	5000	3.56963		54.704					85.4065	54.704	26.9397	37.3586
															average	100	64.9675	22.4396	30.994
	mCherry					DAPI									stdev	12.6743	9.48077	3.99722	5.54106
POP2 1200	Cell count	Objective size	Detection threshold			Cell count	Objective size	Detection threshold	R/B*100						p values		0.00526983	0.0149949	0.0223022
	25	9.7	10000			1985	11.9	5000	1.25945		19.3008
	27	10.4	10000			1963	12.5	5000	1.37545		21.0785
	35	10.1	10000			1991	12.9	5000	1.75791		26.9397
																100	12.6743
POP3 1200	Cell count	Objective size	Detection threshold			Cell count	Objective size	Detection threshold	R/B*100							64.9675	9.48077
	35	8.9	10000			1890	13.4	5000	1.85185		28.3793					22.4396	3.99722
	32	7.9	10000			1800	11.6	5000	1.77778		27.2441					30.994	5.54106
	48	8.2	10000			1969	13.2	5000	2.43779		37.3586
IFI16 PYD	mCherry					DAPI
vector	Cell count	Objective size	Detection threshold			Cell count	Objective size	Detection threshold	R/B*100		%	mean R/B*100 of control
	110	7.2	10000			1833	10.3	5000	6.00109		91.9657	5.41978
	101	8.1	10000			1918	10.4	5000	5.2659		80.699
	98	8.3	10000			1963	10.5	5000	4.99236		76.507
																IFI16 PYD
POP1 1200	Cell count	Objective size	Detection threshold			Cell count	Objective size	Detection threshold	R/B*100							Vector	POP1	POP2	POP3
	80	8.4	10000			2013	10.2	5000	3.97417		60.9034					110.726	73.3271	34.323	43.0521
	68	8.3	10000			2101	9.8	5000	3.23655		49.5996					97.1607	59.7174	43.338	54.8981
	77	8.1	10000			2054	10.1	5000	3.74878		57.4494					92.1136	69.1685	28.7453	54.5781
															average	100	67.4043	35.4688	50.8428
	mCherry					DAPI									stdev	9.62539	6.97423	7.36349	6.7488
POP2 1200	Cell count	Objective size	Detection threshold			Cell count	Objective size	Detection threshold	R/B*100						p values		0.0212193	0.0101281	0.0343834
	37	9.1	10000			1989	10.2	5000	1.86023		28.5077
	47	10.1	10000			2001	10.5	5000	2.34883		35.9953
	32	10.2	10000			2054	10.3	5000	1.55794		23.8751
POP3 1200	Cell count	Objective size	Detection threshold			Cell count	Objective size	Detection threshold	R/B*100
	49	8.7	10000			2100	10.1	5000	2.33333		35.7579
	64	7.9	10000			2151	10.6	5000	2.97536		45.5969
	62	8.1	10000			2096	10.1	5000	2.95802		45.3311
AIM2 FL	mCherry					DAPI
vector	Cell count	Objective size	Detection threshold			Cell count	Objective size	Detection threshold	R/B*100		%	mean R/B*100 of control
	186	6.9	10000			1911	12.3	5000	9.73312		149.158	8.92642
	150	6.2	10000			1909	12.4	5000	7.85752		120.415
	171	6.7	10000			1861	12.5	5000	9.18861		140.814
																AIM2 FL
POP1 1200	Cell count	Objective size	Detection threshold			Cell count	Objective size	Detection threshold	R/B*100							Vector	POP1	POP2	POP3
	137	6.9	10000			1975	10.5	5000	6.93671		106.304					109.037	77.7099	18.9966	20.233
	127	6.9	10000			2014	9.7	5000	6.30586		96.6362					88.0254	70.6427	17.0708	24.9874
	121	6.5	10000			2001	10.2	5000	6.04698		92.6689					102.937	67.7425	21.3579	19.7381
															average	100	72.0317	19.1417	21.6529
	mCherry					DAPI									stdev	10.8095	5.12682	2.14722	2.89842
POP2 1200	Cell count	Objective size	Detection threshold			Cell count	Objective size	Detection threshold	R/B*100						p values		0.0354299	0.00463057	0.00982524
	36	6.6	10000			2123	11.9	5000	1.69571		25.9865
	32	7.4	10000			2100	12.5	5000	1.52381		23.3521
	42	7	10000			2203	12.9	5000	1.90649		29.2166
																100	10.8095
																72.0317	5.12682
POP3 1200	Cell count	Objective size	Detection threshold			Cell count	Objective size	Detection threshold	R/B*100							19.1417	2.14722
	38	6.8	10000			2104	13.4	5000	1.80608		27.6779					21.6529	2.89842
	48	7.8	10000			2152	11.6	5000	2.23048		34.1818
	37	6.1	10000			2100	13.2	5000	1.7619		27.0009
