# Supplementary material for: Design principles for inflammasome inhibition by pyrin-only-proteins
Source: eLife. 2024 Jan 22;13:e81918. doi: 10.7554/eLife.81918 (PMC10803020; doi:10.7554/eLife.81918)
Supplement: Figure 4—source data 1. [file elife-81918-fig4-data1.xlsx]

## Sheet: Fig4-B
NLRP3
	mCherry					DAPI				%		mean R/B*100 of control
NLRP3 PYD-GFP vector 600	Cell count	Objective size	Detection threshold			Cell count	Objective size	Detection threshold	R/B*100
	537	8.3	10044			1662	11.1	5098	32.3105	105.171		30.7219
	448	8	10081			1895	9.2	5244	23.6412	76.9522
	493	7.6	10096			1868	9	5358	26.3919	85.9057
	568	8	10115			1979	9.4	5481	28.7014	93.4232
	522	8.6	10119			1937	9.3	5425	26.9489	87.7188
	626	8	10122			1706	8.7	5500	36.694	119.439
	537	8.3	10125			1510	8.8	5440	35.5629	115.758
	551	8.7	10128			1618	9.1	5470	34.0544	110.847
	530	8.1	10097			1577	8.6	5541	33.6081	109.395
	439	9	10019			1498	10.9	5056	29.3057	95.3904
															NLRP3
NLRP3 PYD-POP1 600	Cell count	Objective size	Detection threshold			Cell count	Objective size	Detection threshold	R/B*100
															600		1200
	233	7.8	10000			1095	9.5	5026	21.2785	69.2618					(-)	(+)	(-)	(+)
	192	8	10005			1117	8.6	5081	17.1889	55.95					105.171	69.2618	84.6014	25.7378
	169	7.8	10010			996	8.1	5087	16.9679	55.2306					76.9522	55.95	135.58	29.698
	204	7.3	10002			1506	12.1	5192	13.5458	44.0917					85.9057	55.2306	84.4615	28.2191
	357	8.4	10019			1540	12.7	5166	23.1818	75.457					93.4232	44.0917	51.7347	17.5548
	347	8.6	10009			1270	13.6	5104	27.3228	88.936					87.7188	75.457	118.585	29.7865
	427	7.7	10056			1685	12.5	5345	25.3412	82.486					119.439	88.936	125.037	36.1327
	323	7.6	10047			1895	11.7	5448	17.0449	55.4811					115.758	82.486
	326	8.4	10061			1971	11.7	5423	16.5398	53.8373					110.847	55.4811
	422	7.9	10079			2109	11.4	5621	20.0095	65.131					109.395	53.8373
															95.3904	65.131
	mCherry					DAPI
NLRP3 PYD-GFP vector 1200	Cell count	Objective size	Detection threshold			Cell count	Objective size	Detection threshold	R/B*100
	210	8.5	10000			923	13.4	5000	22.7519	84.6014		26.8931		average	100	64.5863	100	27.8548
	237	8.5	10000			650	14.8	5000	36.4615	135.58				stdev	14.158	14.276	31.7689	6.10502
	318	7.9	10000			1400	13	5069	22.7143	84.4615
	176	8.3	10000			1265	13	5030	13.913	51.7347
	258	8.4	10000			809	14.5	5000	31.8912	118.585
	306	8.6	10000			910	14.6	5000	33.6264	125.037
NLRP3 PYD-POP1 1200	Cell count	Objective size	Detection threshold			Cell count	Objective size	Detection threshold	R/B*100
	114	8.2	10008			1647	11.7	5168	6.92168	25.7378
	144	8.4	10000			1803	9.9	5338	7.98669	29.698
	113	7.8	10002			1489	12.1	5079	7.58899	28.2191
	88	8.6	10000			1864	11	5255	4.72103	17.5548
	122	8.2	10000			1523	12.6	5104	8.01051	29.7865
	134	8	10000			1379	14.2	5115	9.71719	36.1327
	mCherry					DAPI
GFP vector 600	Cell count	Objective size	Detection threshold			Cell count	Objective size	Detection threshold	R/B*100	%		mean R/B*100 of control
1	388	12.2	5009			1335	13.3	5262	29.0637	103.279		28.1409
2	378	12.3	5008			1653	12.6	5457	22.8675	81.2608
3	384	12.7	5015			1636	12.2	5857	23.4719	83.4085
4	324	12	5000			1200	15.2	5097	27	95.9458
5	303	11.8	5000			832	15.5	5091	36.4183	129.414
6	375	12.4	5000			1249	13.1	5176	30.024	106.692
POP2 600
1	250	11.7	5000			847	14.3	5063	29.5159	104.886
2	242	10.9	5000			796	14.4	5070	30.402	108.035
3	267	11.5	5000			897	13.3	5095	29.7659	105.774					NLRP3
4	231	11.4	5000			664	14.2	5015	34.7892	123.625
5	254	12.2	5000			831	13.4	5056	30.5656	108.616					600		1200
6	255	11.7	5000			827	13.7	5039	30.8343	109.571					(-)	(+)	(-)	(+)
															103.279	104.886	105.664	57.5948
GFP vector 1200	Cell count	Objective size	Detection threshold			Cell count	Objective size	Detection threshold	R/B*100						81.2608	108.035	100.737	55.398
1	86	9	15000			1053	12.7	5115	8.16714	105.664		7.72932			83.4085	105.774	86.2517	52.3926
2	102	9	15000			1310	11.1	5198	7.78626	100.737					95.9458	123.625	85.1907	37.824
3	74	8.5	15000			1110	14.1	5202	6.66667	86.2517					129.414	108.616	111.532	48.6285
4	91	9.2	15000			1382	13.4	5349	6.58466	85.1907					106.692	109.571	110.624	73.3584
5	100	9.7	15000			1160	14.1	5255	8.62069	111.532
6	105	8.8	15000			1228	13.8	5283	8.55049	110.624				average	100	110.085	100	54.1994
														stdev	17.6839	6.86382	11.7203	11.6832
GFP POP2 1200
1	41	8.5	15000			921	11.5	5057	4.45168	57.5948
2	48	9.1	15000			1121	11.4	5140	4.28189	55.398
3	49	8.3	15000			1210	11.2	5202	4.04959	52.3926
4	39	9.3	15000			1334	11.3	5220	2.92354	37.824
5	38	8.9	15000			1011	12.5	5091	3.75865	48.6285
6	55	8.7	15000			970	13.5	5090	5.6701	73.3584
	mCherry					DAPI
GFP vector 600	Cell count	Objective size	Detection threshold			Cell count	Objective size	Detection threshold	R/B*100	%		mean R/B*100 of control
	553	10.6	5025			1179	13.1	5121	46.9042	97.9286		47.8963
	595	10	5029			1389	13.1	5199	42.8366	89.4361
	696	10	5047			1925	10.2	5248	36.1558	75.4878
	821	10.2	5083			1661	9.5	5436	49.4281	103.198
	894	10.4	5070			1603	9.1	5225	55.7704	116.44
	860	9.8	5057			1528	9.3	5187	56.2827	117.51
POP3 600																NLRP3
	376	9.1	5031			1603	8.1	5442	23.456	48.9725
	410	9.2	5032			1387	8.2	5316	29.5602	61.7171						600		1200
	362	8.4	5019			1383	8.1	5339	26.175	54.6493						(-)	(+)	(-)	(+)
	336	8.9	5023			1472	8.2	5207	22.8261	47.6573						97.9286	48.9725	92.9721	32.1934
	481	9.1	5054			1520	8.2	5423	31.6447	66.0693						89.4361	61.7171	96.1664	40.7366
																75.4878	54.6493	97.3844	46.7234
																103.198	47.6573	95.1863	33.0672
GFP vector 1200	Cell count	Objective size	Detection threshold			Cell count	Objective size	Detection threshold	R/B*100							116.44	66.0693	121.256	23.6009
	460	9.6	5034			1527	9	5158	30.1244	92.9721		32.4016				117.51		97.0346	26.2006
	473	10	5019			1518	9.6	5072	31.1594	96.1664
	467	9.5	5033			1480	8.8	5138	31.5541	97.3844
	392	9.4	5012			1271	9.3	5072	30.8419	95.1863					average	100	55.8131	100	33.7537
	442	10.2	5009			1125	9.2	5064	39.2889	121.256					stdev	16.1482	7.97984	10.533	8.71791
	443	10.3	5015			1409	10	5083	31.4407	97.0346
GFP POP3 1200
	150	8.9	5000			1438	9.6	5073	10.4312	32.1934
	151	9.3	5000			1144	10.5	5024	13.1993	40.7366
	185	9.3	5000			1222	10.6	5036	15.1391	46.7234
	168	8.4	5000			1568	9.2	5097	10.7143	33.0672
	117	8.9	5001			1530	10.1	5115	7.64706	23.6009
	136	9.5	5005			1602	9.6	5100	8.48939	26.2006

## Sheet: Fig4-D
NLRP6PYD
	mCherry					DAPI				%		mean R/B*100 of control
GFP vector 600	Cell count	Objective size	Detection threshold			Cell count	Objective size	Detection threshold	R/B*100
	185	7.6	15021			1051	13	5101	17.6023	75.6436		23.27
	288	7.9	15011			888	13.5	5032	32.4324	139.374
	334	7.7	15032			1439	12.5	5195	23.2106	99.7444
	301	7.9	15031			1483	12.3	5165	20.2967	87.2224
	333	8.1	15046			1460	12.3	5197	22.8082	98.0154
			15000
POP1 600	Cell count	Objective size	Detection threshold			Cell count	Objective size	Detection threshold	R/B*100							NLRP6PYD
	194	7.4	15057			1754	11.2	5223	11.0604	47.5308
	141	7.8	15015			1221	11.8	5048	11.5479	49.6257						600		1200
	214	7.9	15239			1868	10.8	5250	11.4561	49.2311						(-)	(+)	(-)	(+)
	245	7.8	15049			1799	11.6	5299	13.6187	58.5245						75.6436	47.5308	98.8659	42.3934
	254	8	15083			2183	11.2	5655	11.6354	50.0015						139.374	49.6257	91.8028	36.3391
			15000													99.7444	49.2311	99.9832	30.6408
																87.2224	58.5245	88.8602	14.0433
																98.0154	50.0015	120.488
	mCherry					DAPI
GFP vector 1200	Cell count	Objective size	Detection threshold			Cell count	Objective size	Detection threshold	R/B*100
	184	8	15045			1808	11.9	5134	10.177	98.8659		10.2937			average	100	50.9827	100	30.8541
	201	8.2	15271			2127	11.2	5614	9.44993	91.8028					stdev	24.0356	4.3205	12.3727	12.1914
	215	7.8	15079			2089	11.4	5520	10.292	99.9832
	163	7.7	15041			1782	11.2	5180	9.14703	88.8602
	239	8.2	15087			1927	11.5	5345	12.4027	120.488
POP1 1200	Cell count	Objective size	Detection threshold			Cell count	Objective size	Detection threshold	R/B*100
			15000
	71	7.7	15029			1627	12.4	5251	4.36386	42.3934
	60	7.6	15018			1604	12.7	5249	3.74065	36.3391
	61	7.5	15043			1934	12.3	5214	3.15408	30.6408
	34	6.7	15049			2352	11	6745	1.44558	14.0433
	mCherry					DAPI
GFP vector 600	Cell count	Objective size	Detection threshold			Cell count	Objective size	Detection threshold	R/B*100	%		mean R/B*100 of control
	354	10.1	5000			1662	10.3	5429	21.2996	106.975		19.9109
	309	9.8	5000			1777	10.3	5514	17.3889	87.3334
	319	9.9	5005			1688	10.1	5631	18.8981	94.9134
	325	9.7	5000			1763	9.5	5808	18.4345	92.5849
	413	9.9	5013			1906	9.6	6020	21.6684	108.827
	412	10	5017			1892	10.1	6145	21.7759	109.367
															600		1200
															(-)	(+)	(-)	(+)
POP2 600															106.975	73.775	84.0177	37.1788
	234	10.1	5000			1593	10.9	5347	14.6893	73.775					87.3334	66.9848	72.9893	32.8744
	225	10.3	5000			1687	10.6	5428	13.3373	66.9848					94.9134	122.066	73.3896	15.1894
	297	10.7	5000			1222	12.8	5188	24.3044	122.066					92.5849	122.039	128.454	57.9652
	260	10	5000			1070	13.3	5137	24.2991	122.039					108.827	125.02	141.15
	232	11.5	5000			932	13.9	5113	24.8927	125.02					109.367	98.9878
	217	12.5	5000			1101	13	5146	19.7094	98.9878
														average	100	101.479	100	35.8019
														stdev	9.54566	25.9395	32.3884	17.5741
GFP vector 1200	75	8.9	15000			1548	13.6	5757	4.84496	84.0177		5.7666
	58	8.5	15000			1378	14.8	5767	4.209	72.9893
	62	8.3	15000			1465	14.2	5785	4.23208	73.3896
	76	8.4	15000			1026	17	5388	7.40741	128.454
	63	9.5	15000			774	18	5191	8.13953	141.15
	82	9.7	15000			704	17.8	5117
GFP POP2 1200	14	9.5	15000			653	17.2	5051	2.14395	37.1788
	16	9.3	15000			844	16.5	5136	1.89573	32.8744
	12	11.4	15000			1370	15.6	6141	0.875912	15.1894
	24	8	15000			718	16.6	5121	3.34262	57.9652
	mCherry					DAPI
GFP vector 600	Cell count	Objective size	Detection threshold			Cell count	Objective size	Detection threshold	R/B*100	%		mean R/B*100 of control
	518	9.5	5012			1070	13.6	5000	48.4112	118.316		40.9168
	551	9.1	5033			1554	12.3	5092	35.4569	86.656
	630	9.9	5065			1783	12.4	5249	35.3337	86.3549
	703	9.4	5045			1581	12.9	5129	44.4655	108.673
POP3 600
	565	8.9	5058			2003	11.5	5201	28.2077	68.9391						NLRP6PYD
	681	8.7	5065			1931	11.7	5199	35.2667	86.1912
	578	9.7	5042			1561	12.1	5012	37.0275	90.4947						600		1200
	539	9.3	5021			1332	12.5	5000	40.4655	98.8969						(-)	(+)	(-)	(+)
																118.316	68.9391	104.912	24.8207
GFP vector 1200	Cell count	Objective size	Detection threshold			Cell count	Objective size	Detection threshold	R/B*100							86.656	86.1912	93.0641	26.3626
	372	8.9	5041			1887	10.9	5168	19.7138	104.912		18.7907				86.3549	90.4947	98.2044	35.0067
	348	9	5033			1990	10.9	5218	17.4874	93.0641						108.673	98.8969	103.819	34.7504
	346	9	5033			1875	11.8	5206	18.4533	98.2044
	373	9.3	5038			1912	11.7	5223	19.5084	103.819
POP3 1200
	93	9.2	5013			1994	11.1	5197	4.66399	24.8207					average	100	86.1304	100	30.2351
	91	8.3	5011			1837	11	5148	4.95373	26.3626					stdev	16.0722	12.6171	5.47869	5.39964
	94	8.5	5002			1429	11.1	5000	6.57803	35.0067
	105	9.9	5009			1608	10.9	5018	6.52985	34.7504

## Sheet: Fig4-E
NLRP6PYD
[POP1]	t1/2 (1)	t1/2 (2)	t1/2 (3)		Fraction 1	Fraction 2	Fraction 3				IC50
0	7.5	12	10		1	1	1				57.8
25	11.35	16	13		0.660793	0.75	0.769231				86.6
50	13.6	18	15.5		0.551471	0.666667	0.645161				80.6
100	19	27	21		0.394737	0.444444	0.47619
										mean	75
										stdev	15.1947
[POP2]	t1/2 (1)	t1/2 (2)	t1/2 (3)		Fraction 1	Fraction 2	Fraction 3
0	10.7	11	11.3		1	1	1				127
30	13.5	13	15		0.792593	0.846154	0.753333				106
60	14	15	16.5		0.764286	0.733333	0.684848				136
120	19.8	22	23		0.540404	0.5	0.491304
										mean	123
										stdev	15.3948
[POP3]	t1/2 (1)	t1/2 (2)	t1/2 (3)		Fraction 1	Fraction 2	Fraction 3
0	9.1	8.7	8.5		1	1	1				35
15	16	14	10.5		0.56875	0.621429	0.809524				25
30	19.9	16	26		0.457286	0.54375	0.326923				25.5
60	25.6	19	33		0.355469	0.457895	0.257576
										mean	28.5
										stdev	5.63471

## Sheet: Fig4-S2
NLRP3 PYD	mCherry					DAPI
vector	Cell count	Objective size	Detection threshold			Cell count	Objective size	Detection threshold	R/B*100		%	mean R/B*100 of control
	89	7.8	10000			1567	9.3	5000	5.67964		103.852	5.46898
	110	8.2	10000			1899	9.4	5000	5.79252		105.916
	87	8.3	10000			1763	9.5	5000	4.93477		90.232
																NLRP3 PYD
POP1 1200	Cell count	Objective size	Detection threshold			Cell count	Objective size	Detection threshold	R/B*100							Vector	POP1	POP2	POP3
	38	8.1	10000			2013	9.5	5000	1.88773		34.517					103.852	34.517	44.3622	29.4029
	53	8.3	10000			2077	9.7	5000	2.55176		46.6588					105.916	46.6588	48.437	38.6886
	24	8.5	10000			1984	9.2	5000	1.20968		22.1189					90.232	22.1189	63.1146	34.3947
															average	100	34.4316	51.9713	34.1621
	mCherry					DAPI									stdev	8.52203	12.2702	9.86315	4.64718
POP2 1200	Cell count	Objective size	Detection threshold			Cell count	Objective size	Detection threshold	R/B*100						p values		0.00233691	0.0443959	0.00670279
	46	8.6	10000			1896	11.3	5000	2.42616		44.3622
	52	8.4	10000			1963	11.5	5000	2.64901		48.437
	69	8	10000			1999	11.9	5000	3.45173		63.1146					100	8.52203
																34.4316	12.2702
																51.9713	9.86315
																34.1621	4.64718
POP3 1200	Cell count	Objective size	Detection threshold			Cell count	Objective size	Detection threshold	R/B*100
	32	8.3	10000			1990	10.4	5000	1.60804		29.4029
	42	7.9	10000			1985	11.6	5000	2.11587		38.6886
	37	8.1	10000			1967	11.2	5000	1.88104		34.3947
NLRP6 PYD	mCherry					DAPI
vector	Cell count	Objective size	Detection threshold			Cell count	Objective size	Detection threshold	R/B*100		%	mean R/B*100 of control
	198	7.8	10000			1991	12.1	5000	9.94475		181.839	11.0612
	247	8.1	10000			1934	10.4	5000	12.7715		233.525
	206	8.7	10000			1968	11.2	5000	10.4675		191.397
																NLRP6 PYD
POP1 1200	Cell count	Objective size	Detection threshold			Cell count	Objective size	Detection threshold	R/B*100							Vector	POP1	POP2	POP3
	106	8.1	10000			2001	10.1	5000	5.29735		96.8618					89.9064	47.8912	57.4309	56.5037
	93	8.3	10000			1987	9.9	5000	4.68042		85.5813					115.461	42.3138	69.0794	58.341
	82	8.5	10000			1999	10.4	5000	4.10205		75.0058					94.6322	37.0849	54.2068	43.2184
															average	100	42.43	60.239	52.6877
	mCherry					DAPI									stdev	13.5969	5.40404	7.82384	8.25192
POP2 1200	Cell count	Objective size	Detection threshold			Cell count	Objective size	Detection threshold	R/B*100						p values		0.0235138	0.0101086	0.0220681
	120	9.1	10000			1889	10.9	5000	6.35257		116.156
	149	8.4	10000			1950	10.1	5000	7.64103		139.716
	118	9	10000			1968	10.2	5000	5.99593		109.635					100	13.5969
																42.43	5.40404
																60.239	7.82384
																52.6877	8.25192
POP3 1200	Cell count	Objective size	Detection threshold			Cell count	Objective size	Detection threshold	R/B*100
	110	8.5	10000			1760	11.1	5000	6.25		114.281
	129	7.8	10000			1999	11.2	5000	6.45323		117.997
	98	8.4	10000			2050	11.4	5000	4.78049		87.411
ELISA
							trial 1	Trial 2	Trial 3		average	error		p values
(-) NG							166.787	116.365	56.9018		113.351	55.0043
(+) NG							7124.74	6343.46	6562.91		6677.04	402.951		0.00105087
POP1 (1000ng) + NG							2651.57	1179.85	2306.58		2046	769.689		0.00347089
POP1 (500ng) + NG							2583.56	2236.26	3507.28		2775.7	656.929		0.0125389
POP1 (250ng) + NG							4542.8	4497.68	139.565		3060.01	2529.28		0.125591
POP2 (1000ng) + NG							142.366	155.063	105.689		134.373	25.6391		0.00126746
POP2 (500ng) + NG							638.993	409.73	212.995		420.573	213.206		0.000703771
POP2 (250ng) + NG							1146.76	1262.99	1008.36		1139.37	127.477		0.00218417
POP3 (1000ng) + NG							294.359	450.133	401.432		381.975	79.6887		0.00195334
POP3 (500ng) + NG							1006.03	1104.53	1150.21		1086.92	73.6861		0.00230792		0.0421356
POP3 (250ng) + NG							2507.79	3409.57	5572.03		3829.8	1574.75		0.112916
