# Supplementary material for: Design principles for inflammasome inhibition by pyrin-only-proteins
Source: eLife. 2024 Jan 22;13:e81918. doi: 10.7554/eLife.81918 (PMC10803020; doi:10.7554/eLife.81918)
Supplement: Figure 5—source data 1. [file elife-81918-fig5-data1.xlsx]

## Sheet: Fig5-C
AIM2WT
Time (min)	0	1	2	3	N73L-AIM2PYD (µM)						Time (min)	0	15	30	D23K-AIM2PYD (µM)
0	0.19034	0.18538	0.18373	0.18143							0	0.19144	0.18755	0.17914
1	0.19261	0.18692	0.1865	0.18574							1	0.19941	0.19432	0.18677
2	0.20396	0.19553	0.19074	0.18997							2	0.21034	0.20351	0.19315
3.0017	0.21511	0.20111	0.19726	0.19403							3.0017	0.22069	0.21295	0.19768
4.0017	0.22631	0.20637	0.20058	0.19884							4	0.22666	0.21759	0.20248
5.0017	0.22881	0.21077	0.20487	0.20225							5.0017	0.23391	0.2243	0.20928
6.0017	0.23983	0.21474	0.2104	0.20647							6.0017	0.24344	0.23099	0.21478
7.0017	0.24203	0.22047	0.2129	0.20929							7.0017	0.24887	0.23818	0.22099
8.0017	0.25031	0.22644	0.21821	0.21274							8.0017	0.24974	0.24013	0.22509
9.0017	0.2557	0.2281	0.22198	0.2177							9.0017	0.2561	0.24476	0.22723
10.002	0.26483	0.2332	0.2233	0.22047							10.002	0.25878	0.24905	0.23256
11.002	0.26621	0.23837	0.23004	0.22301							11.002	0.26208	0.25126	0.2355
12.002	0.27434	0.23794	0.23235	0.2247							12.002	0.26569	0.26005	0.24001
13.002	0.27753	0.24363	0.23458	0.22636							13.002	0.26571	0.26148	0.2433
14.002	0.2797	0.24739	0.2369	0.22714							14.002	0.26965	0.26407	0.24658
15.002	0.2845	0.24913	0.23945	0.23188							15.002	0.27354	0.26849	0.24725
16.002	0.28835	0.25164	0.24092	0.23407							16.002	0.27915	0.26715	0.24807
17.002	0.29316	0.25568	0.24065	0.23468							17.003	0.27831	0.27409	0.25537
18.002	0.29392	0.25714	0.24341	0.2351							18.002	0.28129	0.27594	0.25395
19.003	0.29867	0.25875	0.24605	0.23711							19.003	0.28265	0.27714	0.25768
20.003	0.30056	0.26056	0.24843	0.24147							20.002	0.28725	0.27907	0.26023
21.003	0.30164	0.26588	0.24645	0.24055							21.002	0.28664	0.28187	0.26522
22.003	0.30754	0.26492	0.25293	0.2414							22.003	0.28928	0.28166	0.2623
23.003	0.31582	0.26667	0.25468	0.24317							23.003	0.29255	0.28532	0.26451
24.003	0.3114	0.26987	0.2569	0.24268							24.003	0.29295	0.28818	0.26583
25.003	0.31816	0.27	0.25652	0.24711							25.003	0.29531	0.29054	0.26864
26.003	0.31754	0.27186	0.25732	0.24544							26.003	0.29776	0.29268	0.26858
27.003	0.32074	0.2766	0.2588	0.24748							27.003	0.29993	0.29377	0.27312
28.003	0.32618	0.27736	0.25874	0.25069							28.003	0.3037	0.29441	0.27327
29.003	0.32263	0.27789	0.261	0.24979							29.003	0.30219	0.29734	0.27268
30.003	0.32429	0.28046	0.25952	0.25331							30.003	0.30624	0.2981	0.27693
31.022	0.33176	0.27934	0.26243	0.25253							31.003	0.30698	0.30057	0.2775
32.003	0.33069	0.282	0.26101	0.25131							32.003	0.30857	0.29919	0.27926
33.003	0.33275	0.28189	0.26353	0.25222							33.003	0.31125	0.30118	0.27906
34.005	0.33432	0.28553	0.26602	0.25712							34.003	0.31162	0.30323	0.28109
35.005	0.33834	0.28672	0.26603	0.25653							35.003	0.31332	0.30298	0.28409
36.005	0.33672	0.28658	0.26898	0.25823							36.003	0.31573	0.3065	0.28312
37.005	0.33848	0.28943	0.26895	0.26246							37.005	0.31652	0.30728	0.2823
38.005	0.34574	0.28966	0.26998	0.25806							38.005	0.31999	0.30823	0.28752
39.005	0.3407	0.28751	0.27208	0.2594							39.005	0.32039	0.31196	0.28474
40.005	0.34203	0.29146	0.27128	0.26098							40.005	0.32042	0.3098	0.28775
41.005	0.34854	0.29343	0.2718	0.26098							41.005	0.32175	0.30861	0.29118
42.023	0.34912	0.29688	0.27489	0.26245							42.005	0.32653	0.3145	0.28756
43.005	0.35092	0.29356	0.27492	0.2632							43.005	0.32328	0.31309	0.28884
44.005	0.34783	0.2959	0.27496	0.26368							44.005	0.32447	0.31253	0.29482
45.005	0.34895	0.298	0.27529	0.26554							45.005	0.3284	0.31724	0.29072
46.005	0.34991	0.29872	0.27886	0.26571							46.023	0.32831	0.31642	0.2936
47.005	0.35443	0.29851	0.27877	0.26552							47.005	0.32699	0.31534	0.29253
48.005	0.35568	0.30112	0.27919	0.26526							48.007	0.33325	0.31604	0.29058
49.007	0.3564	0.29986	0.28266	0.26755							49.005	0.333	0.3177	0.29828
50.005	0.3566	0.30151	0.27839	0.27122							50.005	0.33441	0.31911	0.29761
51.005	0.35922	0.30368	0.28042	0.26744							51.005	0.33111	0.32257	0.2956
52.007	0.35631	0.30414	0.28135	0.26966							52.005	0.33177	0.31803	0.29832
53.007	0.36041	0.3037	0.28062	0.26991							53.005	0.33342	0.31958	0.29902
54.007	0.36248	0.30595	0.28567	0.27246							54.007	0.33769	0.32119	0.30084
55.007	0.36173	0.30409	0.28347	0.27042							55.005	0.34038	0.32108	0.30214
56.007	0.36332	0.30812	0.28268	0.27453							56.007	0.34025	0.32293	0.29842
57.007	0.35955	0.30884	0.28435	0.27221							57.007	0.34144	0.3232	0.3
											58.007	0.34235	0.32169	0.30152
											59.007	0.34166	0.32596	0.30064

## Sheet: Fig5-E
			mCherry			DAPI
			Cell count	Objective size	Detection threshold	Cell count	Objective size	Detection threshold	R/B*100	mean			Inhibition (%)
	AIM2 PYD-eGFP (600ng)	1	189	9.6	5000	1273	11.2	5248	14.85	16.26			91.31
		2	210	9.4	5000	1337	10.3	5344	15.71				96.6
		3	223	9	5000	1335	12.1	5232	16.7				102.74				mCherry tagged AIM2 PYD WT
		4	221	9.5	5000	1243	9.8	5312	17.78				109.35				eGFP control or eGFP-tagged AIM2 PYD mutants
	AIM2 PYD N73L-eGFP (600ng)	1	27	9.7	5000	1370	11.7	5123	1.97	1.7			12.12				(-)	N73L		D23K
		2	25	9.2	5000	1220	12.1	5430	2.05				12.6				600ng	600ng	1200ng	600ng	1200ng
		3	20	9.6	5000	1377	12.2	5431	1.45				8.93				91.31	12.12	1	20.22	14.38
		4	17	8.9	5000	1294	10.3	5109	1.31				8.08				96.6	12.6	1.34	23.85	8.79
	AIM2 PYD N73L-eGFP (1200ng)	1	2	9.6	5000	1234	10.4	5092	0.16	0.18			1				102.74	8.93	1.57	29.07	9.1
		2	3	9.4	5000	1378	10.5	5137	0.22				1.34				109.35	8.08	0.48	35.79	10.12
		3	4	9.2	5000	1567	12.1	5139	0.26				1.57
		4	1	9.6	5000	1294	12.2	5231	0.08				0.48			average	100	10.43	1.1	27.23	10.6
	AIM2 PYD D23K-eGFP (600ng)	1	50	9.1	5000	1521	12	5231	3.29	4.43			20.22			stdev	7.79	2.26	0.48	6.76	2.58
		2	53	9.9	5000	1367	10.3	5123	3.88				23.85
		3	64	9.7	5000	1354	11.3	5443	4.73				29.07
		4	70	8.7	5000	1203	11.9	5218	5.82				35.79				p value	5.62537e-07	2.4796e-07	7.91122e-06	6.09447e-07
	AIM2 PYD D23K-eGFP (1200ng)	1	32	9.4	5000	1369	13.1	5318	2.34	1.72			14.38
		2	20	8.3	5000	1399	12.1	5219	1.43				8.79
		3	19	8	5000	1284	12.3	5231	1.48				9.1
		4	21	9.5	5000	1276	11.3	5342	1.65				10.12
